# Supplementary material
Source: Springer Nature journal article supplement (https://www.springermedizin.de/resource/supplementary/12960_2010_251_MOESM11_ESM.pdf/9570746)
Supplement: MOESM11 [file 9570746]

**Key assumptions of the base simulation model**

| <b>Variable</b>                                                              | <b>Key assumptions</b>                                                                                                            |
|------------------------------------------------------------------------------|-----------------------------------------------------------------------------------------------------------------------------------|
| <b>New medical graduates</b>                                                 | Only domestic students are counted.<br>The number of medical school graduates is equal to the government's medical student quota. |
| <b>The probability that practitioners die</b>                                | Practitioners die according to death probabilities calculated using the Complete Life Table.                                      |
| <b>Pass rate for Japanese national examination for medical practitioners</b> | Pass rates remain constant at the rate achieved in the last decade (2000-2009).                                                   |
| <b>Male/female ratio of new medical graduates</b>                            | Male/female ratios of new medical graduates remain constant at the ratio seen in the last decade (2000-2009).                     |

**Table 5**
